# Supplementary material
Source: publisher figshare collection journal article supplement (https://frontiersin.figshare.com/ndownloader/files/20261874)
Supplement: Supplementary file 1 [file 20261874]

Archive with 16 entries (16 files):
- G11_300V.tif
- G12_300V.tif
- G13_300V.tif
- G14_300V.tif
- G21_300V.tif
- G22_300V.tif
- G23_300V.tif
- G24_300V.tif
- G31_300V.tif
- G32_300V.tif
- G33_300V.tif
- G34_300V.tif
- G41_300V.tif
- G42_300V.tif
- G43_300V.tif
- G44_300V.tif
